# Supplementary material
Source: PubMed Central journal article supplement (PMC3883442)

A

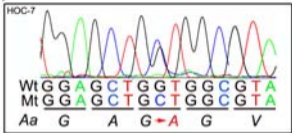

B

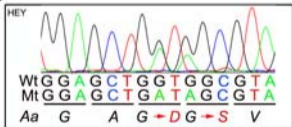

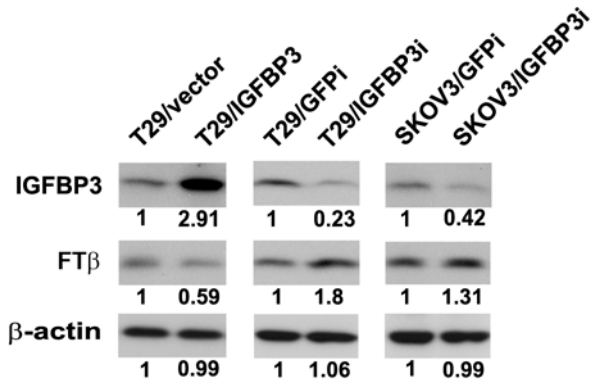

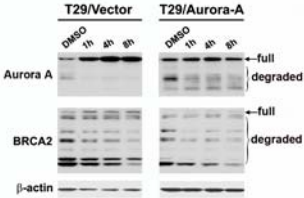

Supplement: NIHMS438398-supplement-Supp_Fig_S1-S3.pdf [file NIHMS438398-supplement-Supp_Fig_S1-S3.pdf]
